# Supplementary material
Source: PubMed Central journal article supplement (PMC4143753)
Supplement: NIHMS58741-supplement-1.pdf [file NIHMS58741-supplement-1.pdf]

**Supplemental Table S1**

Total number of events counted for each of the subpopulations analyzed by flow cytometry.

| Patient | Viable cells<br>(N° Events) | CD3 <sup>+</sup> cells<br>(N° Events) | CD19 <sup>+</sup> cells<br>(N° Events) |
|---------|-----------------------------|---------------------------------------|----------------------------------------|
| MG-1    | 1,312                       | 859                                   | 115                                    |
| MG-2    | 2,143                       | 1,573                                 | 168                                    |
| MG-3    | 1,443                       | 805                                   | 126                                    |
| MG-4    | 4,183                       | 1,831                                 | 116                                    |
| MG-5    | 25,517                      | 16,894                                | 916                                    |
| MG-6    | 3,953                       | N/A                                   | N/A                                    |

*N/A: not analyzed*

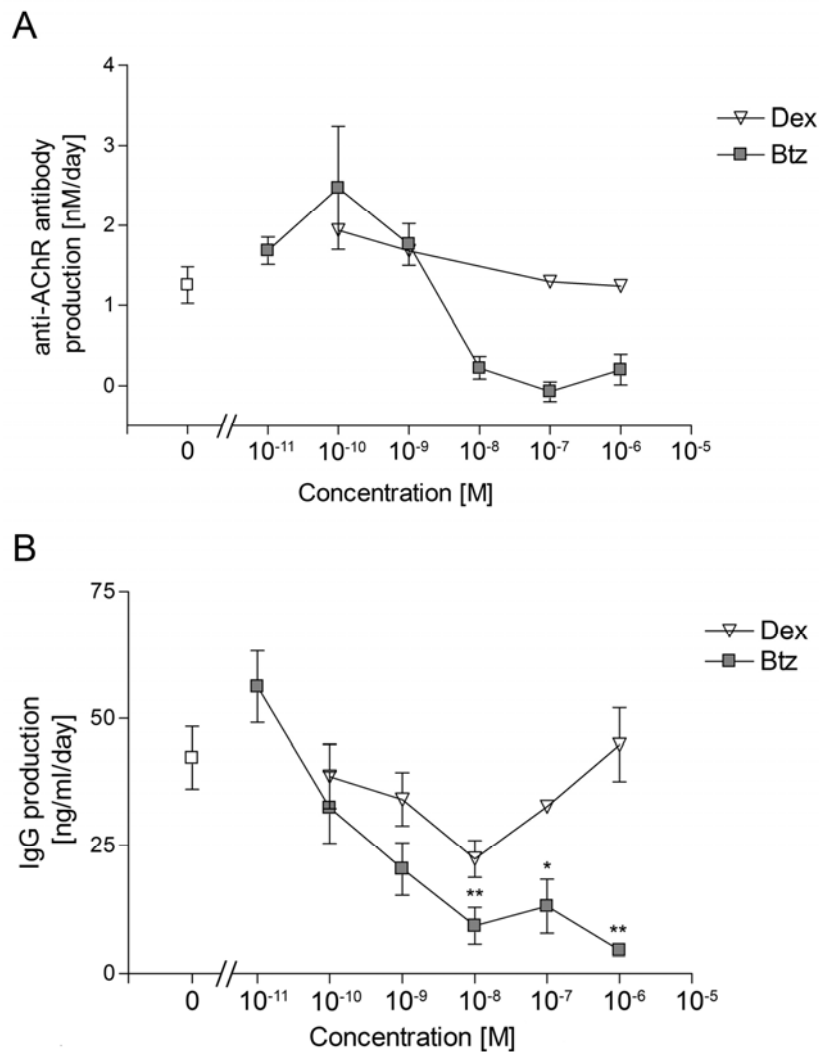

**Supplemental Figure 1.** Drug effects on fresh thymic cell cultures. Thymic cells from patient MG-10 were dispersed mechanically and enzymatically immediately after thymectomy and cultured for 14 days. Bortezomib and dexamethasone were added at different concentrations on days 7 and 11, and cells were collected on day 14. Both AChR Ab (A) and IgG (B) production were reduced by bortezomib at concentrations  $\geq 1 \times 10^{-8}$  M, while dexamethasone had no significant effects on either. Each point represents the average of at least two samples, and error bars correspond to the SEM. One-way ANOVA and Bonferroni post-hoc testing were used for statistical analysis. \*  $p < 0.05$ ; \*\*  $p < 0.01$ , compared with the untreated cultures (white square).

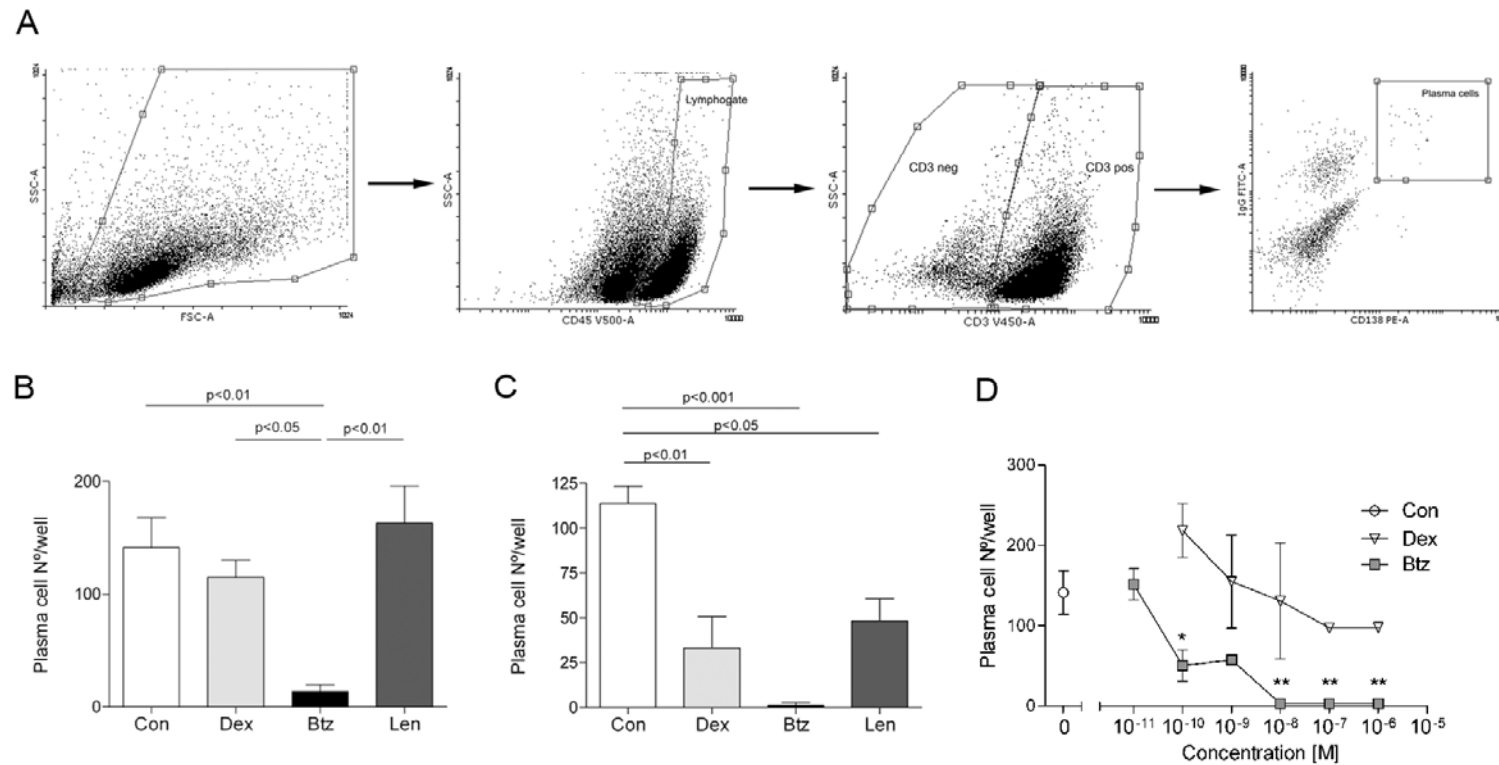

**Supplemental Figure 2.** Cytofluorometric analysis of drug effects on CD138<sup>+</sup> cells. Thymic cells were cultured for 14 days and drugs were added on days 7 and 11. Cells were collected and labeled for FACS analysis on day 14. **A.** Gating strategy for selection of the plasma cell population. We gated on CD45<sup>+</sup>, CD3<sup>-</sup> and IgG<sup>high</sup>/CD138<sup>+</sup> cells and excluded debris and doublets (not shown). Approximately 150,000 events per sample were recorded. Samples exposed to bortezomib showed a very significant reduction in absolute plasma cell numbers when enumerated under the microscope after cytocentrifugation (**B**), and this largely correlated with the drug effects observed by quantifying them by FACS (**C**). Dexamethasone and lenalidomide also reduced their absolute numbers significantly (**C**), but to a lesser extent than bortezomib. (**D**) A broader range of concentrations was tested for both bortezomib and dexamethasone; only bortezomib induced a significant depletion of plasma cell numbers (1x 10<sup>-6</sup>M - 1x 10<sup>-8</sup>M and 1x 10<sup>-10</sup>M). One-way ANOVA was used for statistical comparison between conditions, each bar or point represents the average of 3 replicates and error bars correspond to the SEM. We used cells from patient MG-5 because of higher CD138<sup>+</sup> frequencies/ absolute numbers.

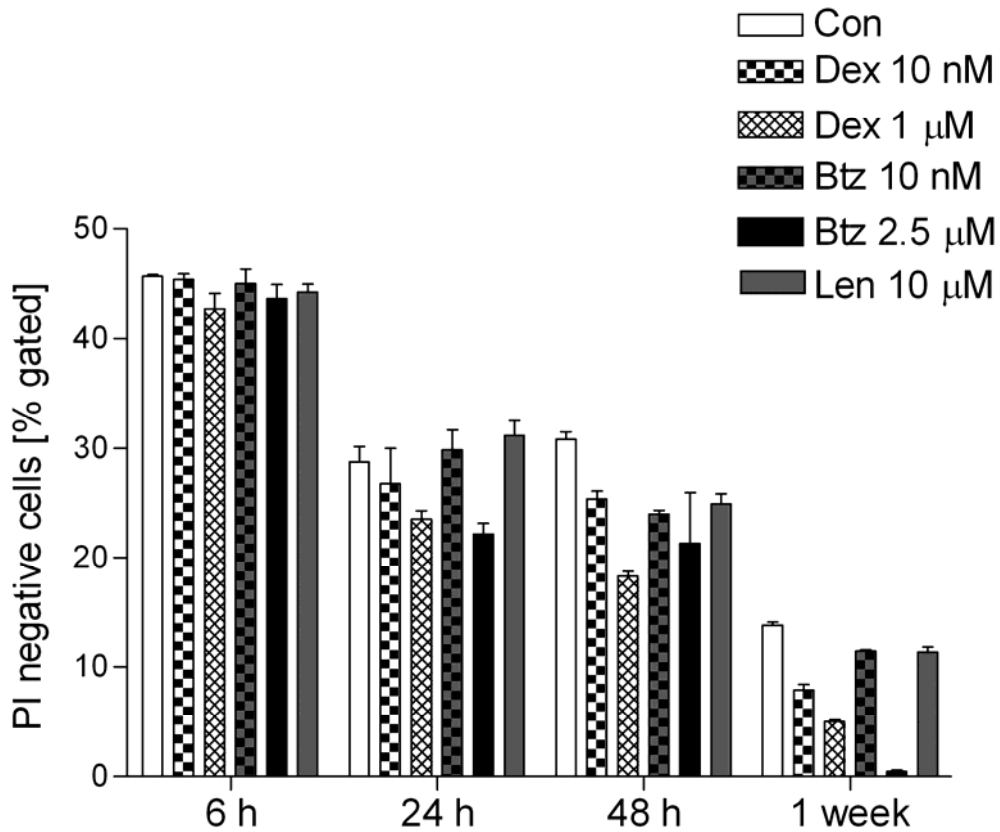

**Supplemental Figure 3.** General toxicity of the experimental drugs on thymic cells. Thymic cells from patient MG-9 were cultured for 1 week in the presence of different concentrations of the experimental drugs. Cell viability was evaluated at 6 h, 24 h, 48 h and 1 week by measuring propidium iodide (PI) incorporation by flow cytometry; samples were gated in the FSC-SSC dot-plot to exclude membrane debris. Cell viability decreased with time in all the conditions and was lower after 1 week exposure to dexamethasone (10 nM and 1  $\mu$ M) and bortezomib 2.5  $\mu$ M than to bortezomib (10 nM) or lenalidomide (10  $\mu$ M). Each bar represents the average of 3 replicates and error bars the SEM.
